# Supplementary material for: High duty cycle echolocation and prey detection by bats
Source: Oxford University Press journal article supplement (doi:10.1242/jeb.048967), 2011-03-09
Supplement: jeb048967tables1-s2.pdf [file jeb048967tables1-s2.pdf]

Table S1. Eigenvalues of the correlation matrix of the principal component analysis

| PC | Eigenvalue | Difference | Cumulative | Proportion |
|----|------------|------------|------------|------------|
| 1  | 2.89277185 | 1.15532347 | 0.3616     | 0.3616     |
| 2  | 1.73744838 | 0.24561962 | 0.2172     | 0.5788     |
| 3  | 1.49182876 | 0.68593583 | 0.1865     | 0.7653     |
| 4  | 0.80589293 | 0.20103049 | 0.1007     | 0.8660     |
| 5  | 0.60486244 | 0.13767157 | 0.0756     | 0.9416     |
| 6  | 0.46719087 | 0.46718611 | 0.0584     | 1.0000     |
| 7  | 0.00000477 | 0.00000477 | 0.0000     | 1.0000     |

PC1 accounts for 36.16% of the variation in the data, PC2 accounts for 21.72% and PC3 accounts for 18.65%. Those three PCs together account for 76.53% of the variation and they are the only ones with eigenvalues >1.

Table S2. Relative contribution of call variables to the principal components

| Call variable     | PC1      | PC2       | PC3       |
|-------------------|----------|-----------|-----------|
| Pulse duration    | 0.090632 | -0.151037 | 0.620713  |
| Duty cycle        | 0.186921 | -0.109060 | 0.578823  |
| Sweep rate        | 0.000463 | 0.615816  | -0.204116 |
| Maximum frequency | 0.549517 | 0.202780  | -0.060987 |
| Minimum frequency | 0.513313 | -0.280338 | -0.243356 |
| Peak frequency    | 0.572671 | -0.039919 | -0.163150 |
| Bandwidth         | 0.058025 | 0.648559  | 0.242518  |

For PC1, the spectral variables peak frequency, maximum frequency and minimum frequency have higher factor loading (>0.51) than the other variables (<0.18). PC2 is defined by sweep rate and bandwidth with factor loadings >0.62, in comparison to <0.20 for the others. Finally, PC3 includes the time-related variables pulse duration and duty cycle, which show factor loadings >0.58 (other variables <0.24).
